# Supplementary material
Source: PubMed Central journal article supplement (PMC2590733)
Supplement: tpc.108.059857_1.pdf [file tpc.108.059857_1.pdf]

Supplemental Data. Vernié et al. (2008). EFD is an ERF transcription factor involved in the control of nodule number and differentiation in *Medicago truncatula*

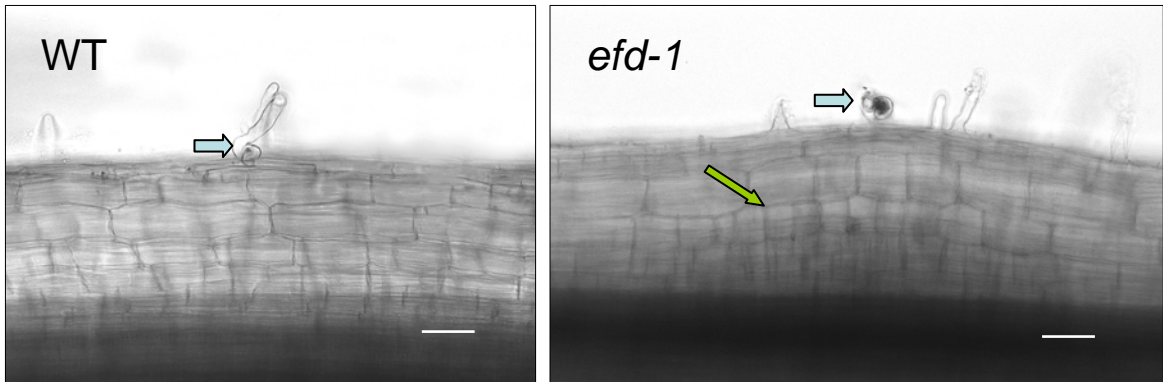

**Supplemental Figure 1.** Cortical cell divisions are frequently associated with root hair curls in the *efd-1* mutant but not in WT plants. Aeroponically grown plants, 21 days post inoculation with *S. meliloti hemA:lacZ*. The blue arrows show root hair curls and the green arrow indicates cortical cell divisions. *S. meliloti* bacteria are stained by a  $\beta$ -galactosidase assay. Bars= 50  $\mu$ m.

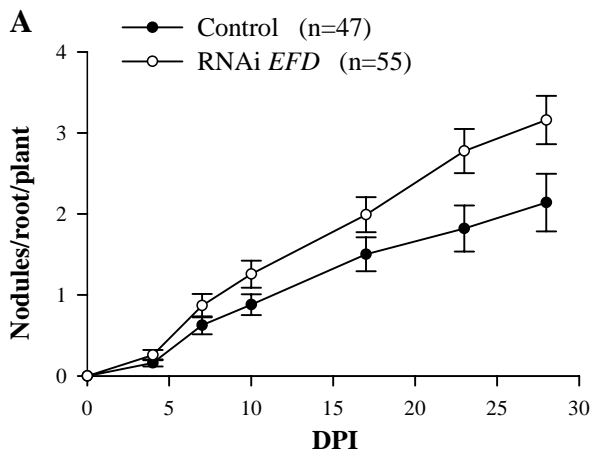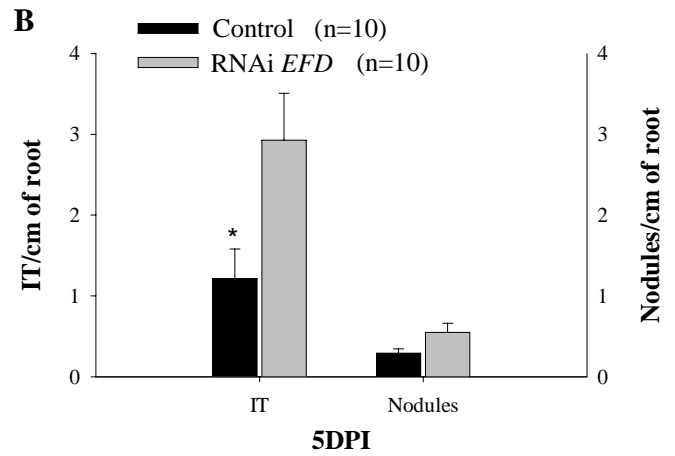

**Supplemental Figure 2.** A weak supernodulant phenotype is exhibited by *EFD* RNAi roots

**A:** One-month-old transgenic roots transformed with *P35S:RNAi EFD* or with the empty cloning vector (control) were inoculated by wild type *S. meliloti*. Nodules were counted until 28 days post inoculation (DPI). The graph represents data from two biological repetitions. Error bars represent SE.

**B:** Number of infection threads (IT) and nodules per root at five days post inoculation counted on a third biological repetition of roots transformed with *P35S:RNAi EFD* or empty vector (control). Error bars represent SE. Star indicates statistically significant differences (Mann and Whitney test,  $P < 0.05$ ).

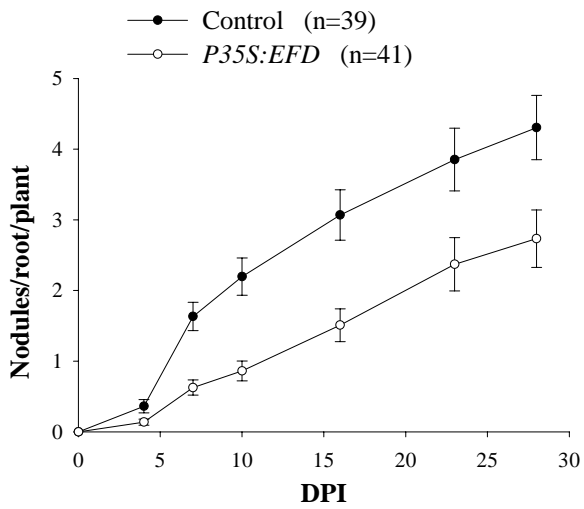

**Supplemental Figure 3.** A decrease in nodulation is exhibited by *EFD* overexpressing roots

One-month-old transgenic roots expressing *P35S:EFD* or empty vector (control) constructs were inoculated by wild type *S. meliloti*. Nodules were counted until 28 days post inoculation (DPI). Graph represents 2 biological repetitions. Error bars represent SE. Differences are statistically significant (Mann and Whitney test,  $P < 0.001$ ).

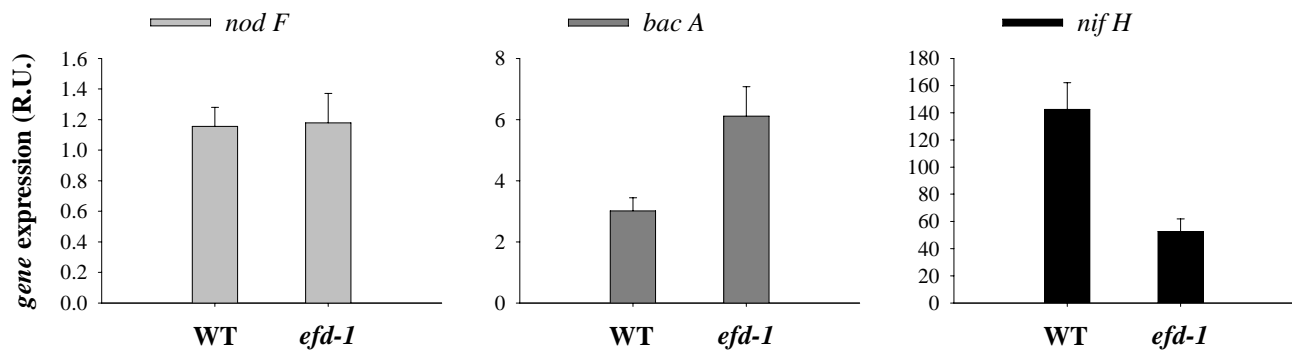

**Supplemental Figure 4.** Q-RT-PCR analyses of bacterial symbiotic genes expression in *efd-1* vs. wild type nodules.

*nodF*, *bacA* and *nifH* expression was measured on 10-day-old nodules of wild type (WT) *M. truncatula* or *efd-1* mutant. All data are from three biological repetitions and were normalized by *Pnp* (SMc00324) expression. Error bars represent SE.

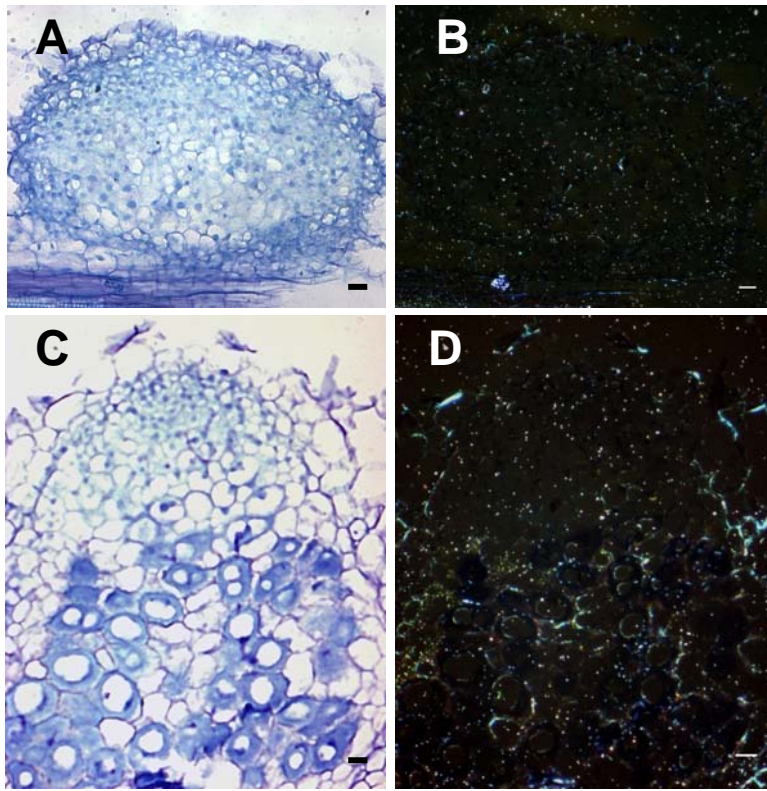

**Supplemental Figure 5.** *In situ* hybridization on nodule sections with a control  $^{35}\text{S}$ -labelled *EFD* sense probe. **A, B:** 4-day-old nodules; **C, D:** 10-day-old nodules; **A, C:** bright field; **B, D:** dark field.

No hybridisation signals (white dots) are detected in B, D, as expected for a sense probe. Bars= 40  $\mu\text{m}$ .

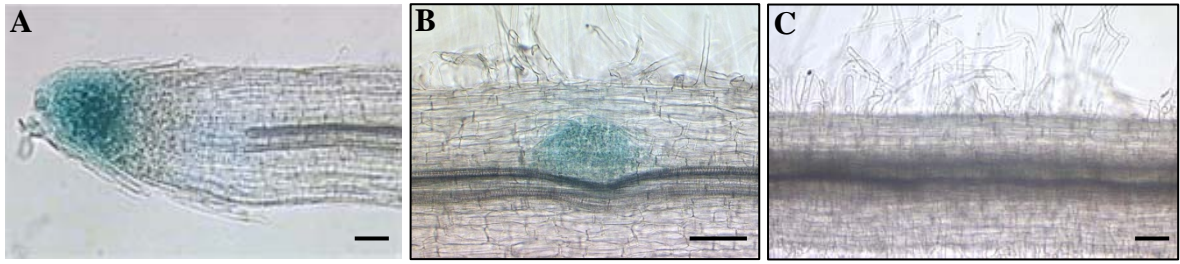

**Supplemental Figure 6.** *EFD* is expressed in root tips and root primordia and is not induced by purified Nod factors.

Localization of *EFD* mRNA, using a promoter:GUS fusion (blue color). The *PEFD:GUS* fusion is expressed in the root meristematic region (A) and in lateral root primordia (B) of non inoculated *M. truncatula* roots, but is not induced by a 48h incubation with 10<sup>-8</sup>M Nod factors (C). Bars = 50  $\mu$ m.

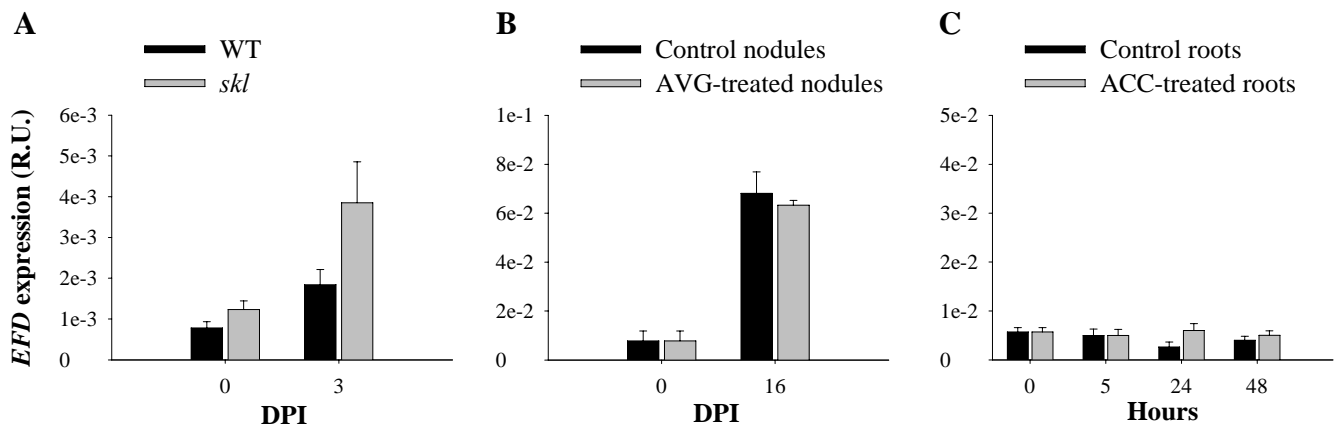

**Supplemental Figure 7. *EFD* expression is not induced by ethylene**

**A:** Q-RT-PCR analysis of *EFD* expression in wild type (WT) and *skl* *M. truncatula* roots at 0 and 3 days post inoculation (DPI) with wild type *S. meliloti*.

**B:** Q-RT-PCR analysis of *EFD* expression in 16-day-old nodules from wild type *M. truncatula* roots inoculated with wild type *S. meliloti*, grown on normal media (Control) or on media supplemented with 10 $\mu$ M AVG (Aminoethoxyvinyl-glycine).

**C:** Q-RT-PCR analysis of *EFD* expression in wild type *M. truncatula* roots treated by water (Control) or 50 $\mu$ M ACC (1-aminocyclopropane-1-carboxilate).

All data are from at least 2 biological repetitions and are normalized by Mt *EF1- $\alpha$*  expression. Error bars represent SE.

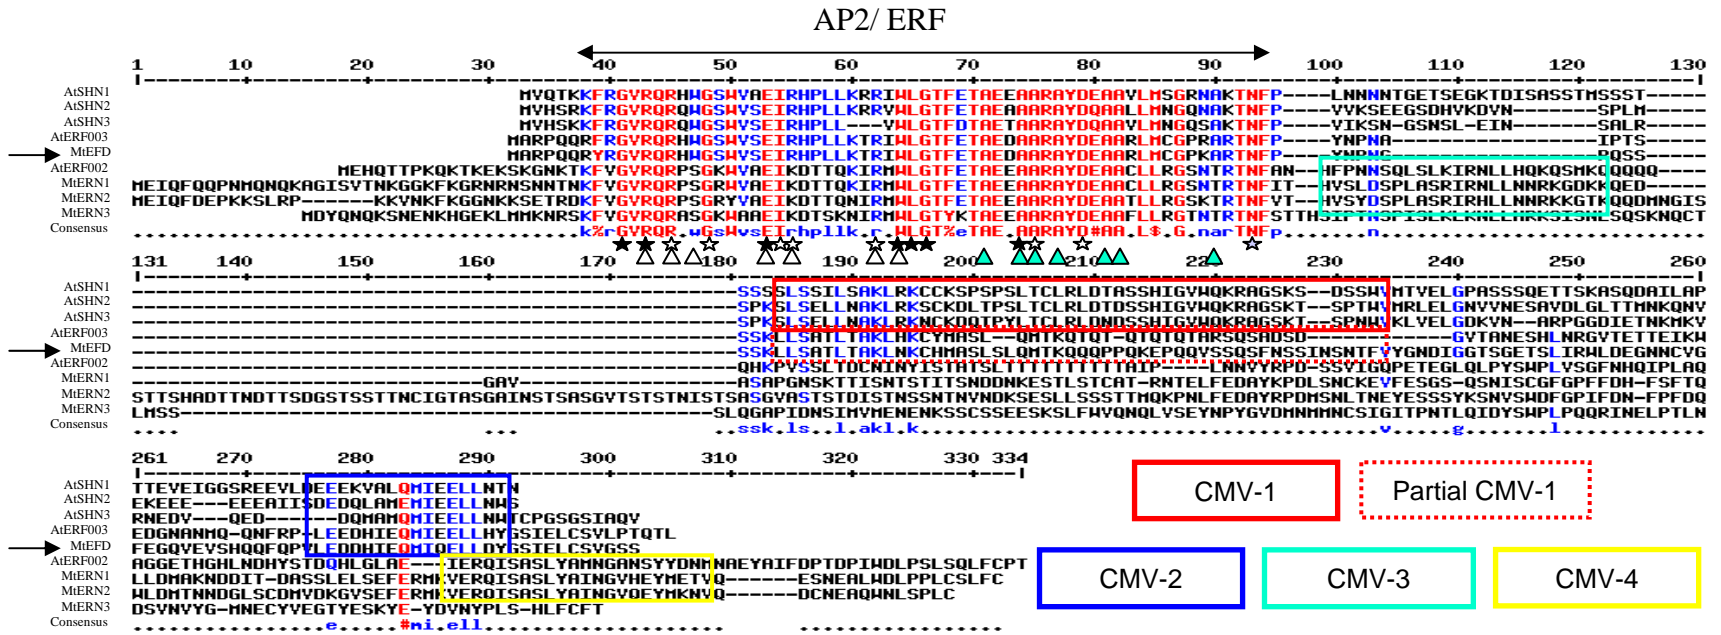

**Supplemental Figure 8.** Alignment analysis of group V ERF proteins from *Medicago truncatula* and *Arabidopsis thaliana*. Black stars indicate residues conserved in all ERF proteins, white stars those found in at least 95% of ERFs, white triangles residues predicted to make direct contacts with DNA and light blue triangles those implicated in the stabilisation of the ERF domain (Allen et al., 1998).



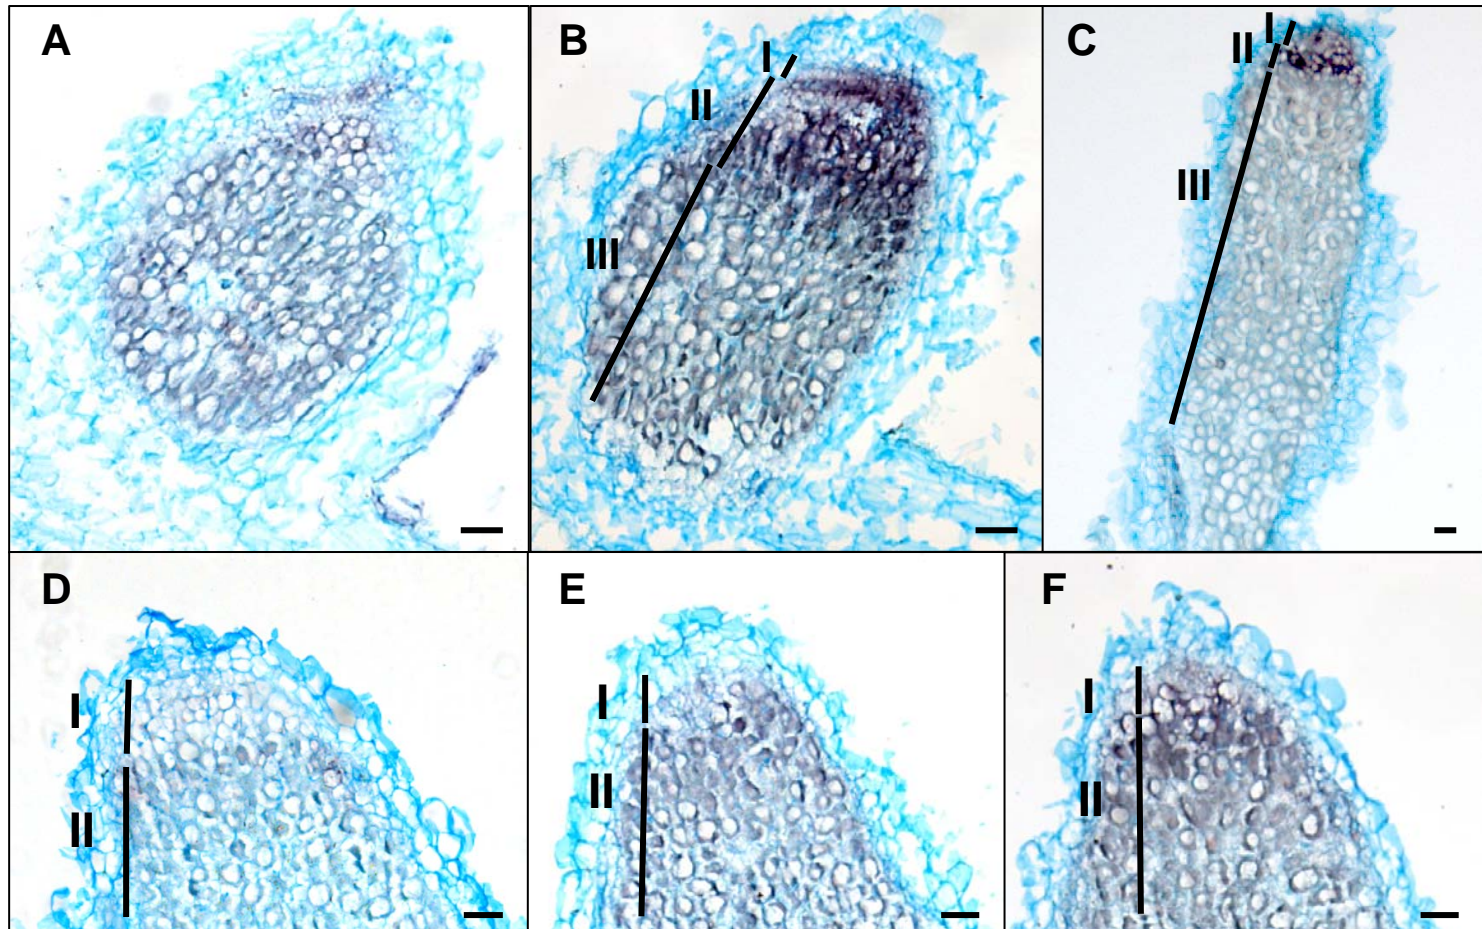

**Supplemental Figure 9.** Mt *RR4* and *EFD* are expressed in nodule zone II.

*In situ* hybridizations carried out on microtome sections of two-week-old (A, B) or four-week-old (C-F) nodules, using digoxigenin-labelled probes. D, E, F show a close up of results from hybridizations carried out on serial sections of the same nodule. **A:** sense control probe (note the homogenous signal in all internal nodule tissues); **B, E:** Mt *RR4* probe; **C, F:** probe for type-A response regulator gene family. **D:** *EFD* probe (note the absence of *EFD* hybridization signal in zone I; the weak *EFD* signal in zone II is validated by more sensitive *in situ* hybridizations carried out with radioactive probes, as shown in Figure 6E, F). Vertical or oblique bars indicate various nodule zones (I, II or III). Bars = 100μm.

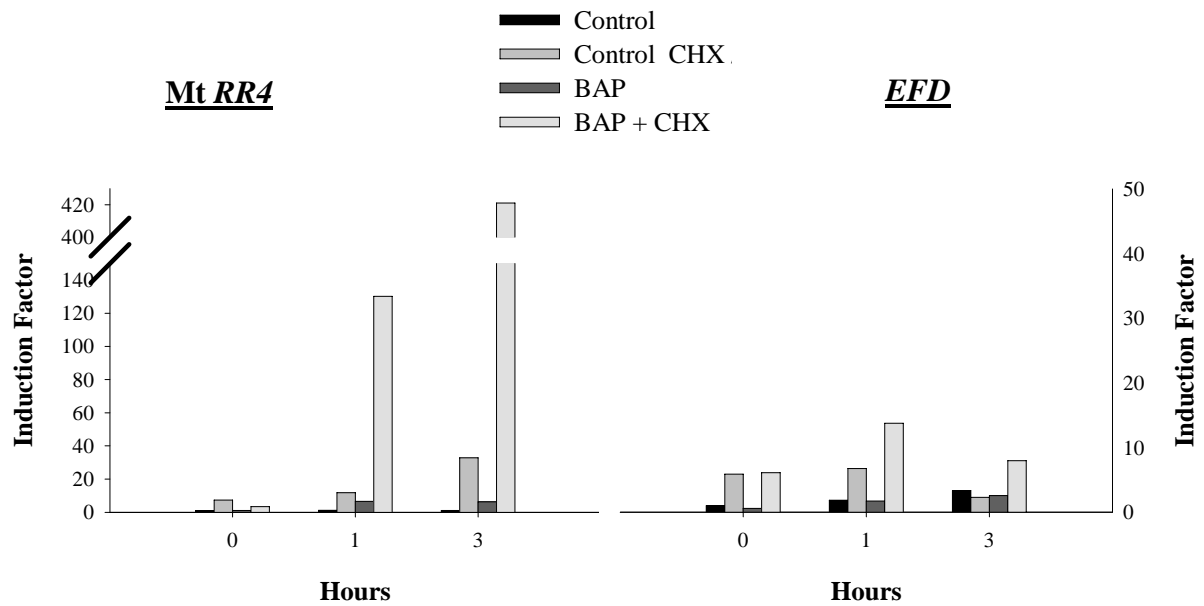

**Supplemental Figure 10.** *Mt RR4* is a primary cytokinin response gene whereas *EFD* transcription is not regulated by cytokinins

Q-RT-PCR analysis of *RR4* and *EFD* induction in response to the cytokinin BAP ( $10^{-7}$ M) or control treatment at various incubation times (1 hour or 3 hours), with or without a cycloheximide (CHX) pretreatment (1 hour, 100  $\mu$ M) to inhibit *de novo* protein synthesis. Induction factors were calculated in reference to non treated roots (control T0). *Mt RR4* induction by BAP alone was 6.5 after 1 hour and 6.3 after 3 hours, whereas no difference was observed for *EFD* between control and BAP-treated plants. Histograms represent the quantification of specific PCR amplification products for each gene normalized with the constitutive control *ACTIN11*. A representative example out of three biological experiments is shown.

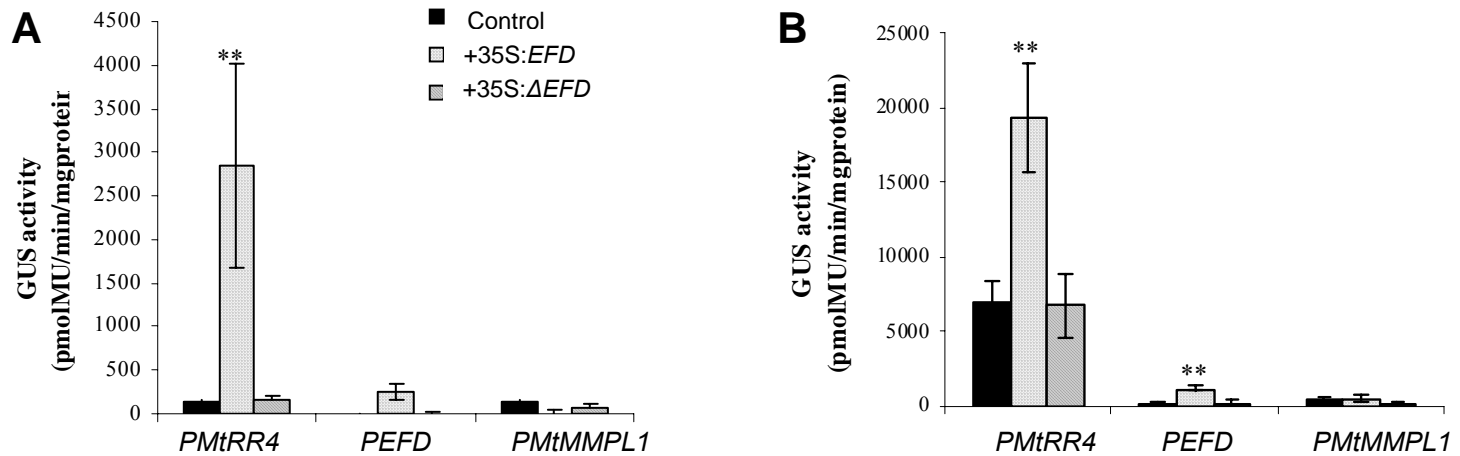

**Supplemental Figure 11.** Trans-activation of *PRR4*, *PEFD* and *PMMPL1* in *Nicotiana benthamiana* by *P35S:EFD:HA*.

**A.** GUS activity at 24 h following co-transformation. **B.** GUS activity at 48 h following co-transformation. For both A. and B., leaves of *N. benthamiana* were co-transformed by *Agrobacterium tumefaciens* with *PRR4:GUS*, *PEFD:GUS* or *PMMPL1:GUS* plus either *P35S:EFD:HA* or *P35S:ΔEFD:HA* ( $\Delta$ EFD is EFD deleted for its putative DNA binding domain). Controls correspond to leaves of *N. benthamiana* transformed with *PRR4:GUS*, *PEFD:GUS* or *PMMPL1:GUS* alone. GUS activity was measured using 10  $\mu$ g of total protein extracts at 24 (**A**) and 48 (**B**) hours after transformation, using three biological repetitions. Error bars represent SE.

*PRR4* was only significantly activated by EFD at 24 and 48 H and *PEFD* at 48H ( $P < 0.01$  for both, following Cumming et al. 2007). *PMMPL1* was not significantly activated.

|              | T0                                        | 1 DPI                                     | 3 DPI                                     |
|--------------|-------------------------------------------|-------------------------------------------|-------------------------------------------|
| WT           | $7.8 \cdot 10^{-4} \pm 1.4 \cdot 10^{-5}$ | $5.7 \cdot 10^{-4} \pm 5.1 \cdot 10^{-5}$ | $1.8 \cdot 10^{-3} \pm 3.7 \cdot 10^{-4}$ |
| <i>efd-1</i> | ND                                        | ND                                        | ND                                        |

**Supplemental Table 1.** Q-RT-PCR analysis of *EFD* expression in wild type (WT) and *efd-1* roots of *Medicago truncatula*, inoculated by wild type *Sinorhizobium meliloti*. Standard error came from three biological repetitions. DPI= days post inoculation. ND= non detectable.

|                                        | Total number of ITs | ITs in epidermis |        | ITs in cortex |       | Nodules     |
|----------------------------------------|---------------------|------------------|--------|---------------|-------|-------------|
| Control (empty vector)                 | 5.81 ± 1.01         | 5.12 ± 0.93      | 88.2%  | 0.69 ± 0.08   | 11.8% | 0.71 ± 0.17 |
| <i>P35S :EFD :VP16</i>                 | 1.66 ± 0.96         | 1.52 ± 0.63      | 91.7 % | 0.14 ± 0.06   | 8.3%  | 0.22 ± 0.09 |
| Ratio Control / <i>P35S :EFD :VP16</i> | 3.5                 | 3.4              |        | 4.9           |       | 3.2         |

**Supplemental Table 2.** Infection thread formation is decreased in *EFD* overexpressing roots. Infection threads (ITs) were induced by *Sinorhizobium meliloti hemA:lacZ* and counted on ten independently transformed roots at 5 days post inoculation following  $\beta$  galactosidase revelation. Results are expressed per cm of root. Standard errors are indicated.

|                  | <i>nfp</i> (C31)                          |                                           | <i>nsp1</i> (B85)                         |                                           | <i>hcl</i> (B56)                          |                                           |
|------------------|-------------------------------------------|-------------------------------------------|-------------------------------------------|-------------------------------------------|-------------------------------------------|-------------------------------------------|
|                  | T <sub>0</sub>                            | 3dpi                                      | T <sub>0</sub>                            | 3dpi                                      | T <sub>0</sub>                            | 3dpi                                      |
| <i>EFD</i>       | $3.5 \cdot 10^{-3} \pm 1.2 \cdot 10^{-5}$ | $6.9 \cdot 10^{-5} \pm 3.5 \cdot 10^{-5}$ | $3.4 \cdot 10^{-4} \pm 1.7 \cdot 10^{-4}$ | $2.1 \cdot 10^{-4} \pm 5.0 \cdot 10^{-5}$ | $7.0 \cdot 10^{-5} \pm 2.4 \cdot 10^{-5}$ | $5.3 \cdot 10^{-5} \pm 1.2 \cdot 10^{-5}$ |
| Mt <i>ENOD11</i> | $6.7 \cdot 10^{-5} \pm 5.7 \cdot 10^{-6}$ | $6.2 \cdot 10^{-5} \pm 7.5 \cdot 10^{-6}$ | $7.9 \cdot 10^{-5} \pm 7.7 \cdot 10^{-5}$ | $7.0 \cdot 10^{-5} \pm 3.2 \cdot 10^{-5}$ | $5.1 \cdot 10^{-5} \pm 3.3 \cdot 10^{-6}$ | $1.1 \cdot 10^{-3} \pm 7.8 \cdot 10^{-4}$ |

**Supplemental Table 3.** Q-RT-PCR analysis of *EFD* and Mt *ENOD11* expression in roots of early symbiotic *Medicago truncatula nfp-1* (C31), *nsp1-1* (B85) and *hcl-1* (B56) mutants, inoculated by wild type *Sinorhizobium meliloti*. Standard error came from at least two biological repetitions.

Supplemental Tables 4, 5, and 6 are available in a separate .xls file online.

**Supplemental Table 7.** Primers used for *PEFD* sequencing

| <b>Name</b>       | <b>Position</b> | <b>Sequence</b>                   |
|-------------------|-----------------|-----------------------------------|
| MtC50408-369-5'   | + 1014          | 5'-CCAAACAACAACAACCACCA-3'        |
| Tail Ap1          | + 932           | 5'-TTGTGGTCCATTTGGGTTGTATGG-3'    |
| Tail Ap2          | + 913           | 5'-TATGGGAAATTGGTACGTGCTTTTG-3'   |
| PMtERF1-714-PG310 | + 202           | 5'-AAAACACATGTGAAAGAGTTTTTCACA-3' |
| Tail Ap3          | + 69            | 5'-AATTCAGAGACCCAAGAACCCCA-3'     |
| PMtERF1-144-PG301 | - 97            | 5'-GAAGTGAAGGTGAAGCAGCTTGCACA-3'  |
| PMtERF1-494-PG314 | - 608           | 5'-GCCCATCGGATCGACGCAAGC-3'       |
| PMtERF1-647-PG314 | - 761           | 5'-ATGAGAAATTGAACCTCATCCCCG-3'    |
| PMtERF1-725-PG339 | - 1357          | 5'-GTTCTCACACACACCTATATAATGGTG-3' |
| PMtERF1-751-PG340 | - 1533          | 5'-CCGCCATCGTTGCCTCCATCAA-3'      |
| PMtERF1-499-PG358 | - 1999          | 5'-TTTTATTGATCTCTACTTACCCA-3'     |
| PMtERF1-649-PG358 | - 2149          | 5'-CGGCAATTGGCATGTGTATG-3'        |



**Supplemental Table 8. Primers used in Q-RT-PCR**

| Gene              | Forward                   | Reverse                   |
|-------------------|---------------------------|---------------------------|
| <i>EF1-a</i>      | CTTTGCTTGGTGCTGTTTAGATGG  | ATTCCAAAGGCGGCTGCATA      |
| <i>Desmin</i>     | CAGCCTCAGTCTCCAAATCACA    | TAGGCCTGAGGTACAGAGGT      |
| <i>Actin11</i>    | ACGAGCGTTTCAGATG          | ACCTCCGATCCAGACA          |
| <i>EFD</i>        | CTCAAAGACACACTTCACAAACACG | CCACACATTAATCTTGCTGCTTCAT |
| <i>Mt RR4</i>     | ATGCTTTTGTTCGGGTTTA       | CTGCACCTTCTCCAAACAT       |
| <i>Mt ENOD11</i>  | CCACATGCAAAGATGGGACG      | CAGCCTCCACCTAGCATCCA      |
| <i>Mt MMPL1</i>   | TTCAAAGGTCTGGGACTTGG      | GCAAAACCAAGGGACAAAGA      |
| <i>nodF</i>       | CATTGGCATCATCAAGAACCG     | TAAATCGCCGACTATTAACGCG    |
| <i>bacA</i>       | GGTCGGTCTTTGGTACGGTTTT    | CGCTGATTGCGAAATTCAG       |
| <i>nifH</i>       | CGGCTTTGCGATGCCTATT       | GCATAGAGCGCCATCATCTCA     |
| <i>pnp</i>        | TGTCATCAGGCTTGCGGAA       | ATCGCATTTTCGAGAGCGG       |
| <i>MtC50408</i>   | CAACGTTATAGAGGTGTACGCCAA  | GGTGACGAATTTAGAGACCCA     |
| <i>MtC00068</i>   | ATGGTGTGACCCTAGCATTCTC    | AACAGCGATGCTATACATCCCAAG  |
| <i>MtC90910</i>   | AGATTTACAGCAGATGTGGTAGCGT | CCCTTCAAACCACCCAAAGAG     |
| <i>MtC45510</i>   | CAAAAGGTGCTGCTGTCTGTGA    | CCGGTTGCATACTAGAAGACCAAG  |
| <i>MtC00651</i>   | CACGACCACGAGGTGGTTTTT     | ACCCTCTCCATACCAACCCCTT    |
| <i>TC106799</i>   | GGTACAACCAATGGAAGCCT      | GGACACATATCTGGTGGACATTCA  |
| <i>MtD19561</i>   | TGTCTTACCCGACGTTCTTG      | CAATCTAAAGAGTCAATTCGGTGCC |
| <i>MtC60355</i>   | TGACAAATCACGGCACCAAG      | CAACATCAGCCTCACGAACATACT  |
| <i>MtC20017</i>   | TATTTGCAGCAGGTGACTGTGCG   | CCCTCTGAAATAGCCCATACCAC   |
| <i>MtD06543</i>   | CAAGAAGCGACGTTCAAGTCTCT   | CCCTTGGTCTTTTGTGTTGGTT    |
| <i>MtC10245</i>   | TGTAAGAAAGGTGACGCGTGTG    | CAGGATGAAGCCAACACTCGA     |
| <i>MtC60404</i>   | AGTGAAGGTTTGCTCCTGCCT     | TATCCGCGTACCCGTATCGTA     |
| <i>MtC60095</i>   | CGGAACTGCAATTGATATGGCT    | TTGAAGAGAGCTTGTGCCAGATG   |
| <i>MtD11051.3</i> | ATCATTTTGGATACACGGCACA    | TGCAGATGGAAAATTTGCCA      |
| <i>MtD01034.2</i> | ATTACTGTGTGATGCTCCGCG     | CCATCCTTCTGACTCCGAAACA    |
| <i>MtC93227</i>   | TCAACTGACAATGCTGCCACAT    | GGAGTCCCATTCTTGAGGTGATT   |
| <i>MtC61980</i>   | AGGAGACAGCTGCAAAGTTTCG    | CGCTGAAACATCCCAAGAAAGTC   |
| <i>MtD07324</i>   | CAAGAATTAGCCAAGGCGACA     | AGCTCCAAATCCACCTTGACC     |
| <i>MtD02444</i>   | GATTCTGCTGCTTTCAGAATGAGG  | CAAACACCAGCTTCCAAAGGAA    |
| <i>MtC61996</i>   | TGCCGAAGGCAGCATCTTTA      | AGCATCAGATCCGATTCTTCAC    |
| <i>MtD09485</i>   | TCCAACCCAGAACAGTGAGA      | ACTGAGCTACGAGAACCTCCCA    |
| <i>MtC00010.5</i> | AGCATGGCACATTACGGTTTG     | GCAGGCACGCAGATCTATCAA     |
| <i>MtD33991</i>   | CTTGCAATCCCCGAACTCTTT     | ACATATCCCGCAGACCCGAAA     |
| <i>MtD09577.1</i> | ACAATCCCAACCTAGAGGACCAAT  | CGGTAATCTTGAACATGAGAACC   |
| <i>MtC00553</i>   | CTGCCACAAAATTTAGTGTGG     | CCCTAAATCACTAGTCGACGAACC  |
| <i>MtC10163</i>   | CAGTACCTGAAATGTGGTCACCG   | CAACTGATCATAAGCTTCTCCCA   |
| <i>MtC45082</i>   | AAATGCGGCTAGTGAACCTGAG    | AAAAGCCCAGAAAGCACGACA     |
| <i>MtC93014</i>   | TCTGCAACAGTCTTCATGGTGGT   | CAACCCTCTCAACGTCCAACAA    |
| <i>MtC00043.1</i> | TACACACTCTCCCTCCATTTTCT   | TGAGAAGCCAAAAGCTAAAGCAC   |
| <i>MtD34353</i>   | GCGTGCAATAATTCACCCAAG     | GGCAGACTAGCTGAATCTGCAGTA  |
| <i>MtD05134</i>   | GAAAACGATCAAGTTCCCACTCC   | GTGTTTGTCTGGCACTTCTTCAG   |
| <i>MtD22297</i>   | CCTTGAACATAACGGTTGGTCTT   | ACTCACAAACCCACGAAAATG     |
| <i>MtC40019</i>   | TGCTCGTGCACAAGGAAACA      | TGCTCTCCGGAAGAAAACCAT     |
| <i>MtD00089</i>   | TACACAACGCAGGAAAACCAACA   | CTGGAAAAGACTGCTCAAGAAGGA  |
| <i>MtC20187</i>   | AATTCCATTGGTCTCCCA        | GGTAGTCCCAACTTGAGCGATG    |
| <i>MtD00210</i>   | GCTTTGTATGGTGGTCTCGAGC    | GCTTGATGCGACTTTCCAACA     |
| <i>MtC60677</i>   | CAAAGGCCCTGTTGTATCTTGTG   | GGCTACAGAATCACGAGCTGCT    |
| <i>MtC10690</i>   | GGCCAGGAACCATTAAGAAAT     | TGTGTTGCTTCGTAGACCCAAA    |
| <i>MtC10582</i>   | TCGGATCTACTGTCCACTTTTGG   | TTGGCATGACGATACCGTGTG     |
| <i>MtC61034</i>   | GCTGGACTTGAATTTGACACCTCT  | GGAATTGGTGTGGTGGTACT      |
| <i>MtC10265</i>   | GCCTGTTGATCCTTACCACAT     | GGTAAAGAGGCTGAGGCTCAGTA   |
| <i>MtC00344</i>   | TGAGTTATTTGCTCCACACGAG    | TGACGAACCCCTGAAGTAGCAG    |
| <i>MtC45620</i>   | GGCAGGCTTTTGAAGACAGTCTT   | GCTGCAATGGCTGTTTGGATAT    |
| <i>MtS00134</i>   | AGGTGGAGGCTGGTTACCATAAG   | GCCTACCACACAAACAACCATCA   |
| <i>MtD03185</i>   | CGTGTTTGGCTTGGAACTTTA     | GGAACCTCGATAGCGGCATTGT    |
| <i>MtC60655.1</i> | AACGCTTTGTATGGTGGTCTCG    | ATGAGACTTTCCAGCAACCCG     |
| <i>MtC63234</i>   | ACAGCTTACCGTCGATCACCTT    | CCATCGATCATGTCTGCCATAG    |
